# Supplementary material
Source: Research Square preprint supplement (doi:10.21203/rs.3.rs-9047848/v1)
Supplement: Supplementary file 1 [file 7dd4d17792f960f13487d610.pdf]

## STROBE Checklist (Cohort Study)

### Title of Study:

Prognostic Impact of Intraoperative Lavage Cytology According to Tumor Sidedness in Stage II/III Resectable Colorectal Cancer

---

### Title and Abstract

| Item | Recommendation                           | Reported (Yes/No) | Page No.         |
|------|------------------------------------------|-------------------|------------------|
| 1    | Study design indicated in title/abstract | Yes               | Title / Abstract |
|      | Informative and balanced abstract        | Yes               | Abstract         |

---

### Introduction

| Item | Recommendation                           | Reported | Page No.     |
|------|------------------------------------------|----------|--------------|
| 2    | Scientific background and rationale      | Yes      | Introduction |
| 3    | Objectives and hypotheses clearly stated | Yes      | Introduction |

---

### Methods

| Item | Recommendation                    | Reported              | Page No.                  |
|------|-----------------------------------|-----------------------|---------------------------|
| 4    | Study design presented early      | Yes                   | Study design              |
| 5    | Setting, locations, and dates     | Yes                   | Study design              |
| 6    | Participants eligibility criteria | Yes                   | Study design              |
|      | Methods of selection              | Yes                   | Study design              |
| 7    | Variables clearly defined         | Yes                   | Methods / Data collection |
| 8    | Data sources and measurement      | Yes                   | Data collection           |
| 9    | Bias addressed                    | Partially             | Discussion                |
| 10   | Study size explained              | No                    | —                         |
| 11   | Quantitative variables handling   | Yes                   | Statistical analysis      |
| 12   | Statistical methods described     | Yes                   | Statistical analysis      |
|      | Confounding control               | Partially             | Statistical analysis      |
|      | Subgroup analysis                 | Yes                   | Results                   |
|      | Missing data handling             | No                    | —                         |
|      | Loss to follow-up                 | Not clearly described | —                         |

---

## Results

| <b>Item Recommendation</b>                   | <b>Reported Page No.</b> |                  |
|----------------------------------------------|--------------------------|------------------|
| 13 Participant numbers at each stage         | Yes                      | Results / Fig. 1 |
| Reasons for non-participation                | Yes                      | Results          |
| Flow diagram                                 | Yes                      | Fig. 1           |
| 14 Descriptive data                          | Yes                      | Table 1          |
| Missing data                                 | No                       | —                |
| Follow-up time                               | Partially                | Methods          |
| 15 Outcome data                              | Yes                      | Results          |
| 16 Main results with estimates and precision | Yes                      | Results          |
| Adjusted estimates                           | Partially                | Table 3          |
| 17 Other analyses (subgroups)                | Yes                      | Results          |

---

## Discussion

| <b>Item Recommendation</b>                | <b>Reported Page No.</b> |            |
|-------------------------------------------|--------------------------|------------|
| 18 Key results summarized                 | Yes                      | Discussion |
| 19 Limitations discussed                  | Yes                      | Discussion |
| 20 Interpretation consistent with results | Yes                      | Discussion |
| 21 Generalizability discussed             | Partially                | Discussion |

---

## Other Information

| <b>Item Recommendation</b>  | <b>Reported</b> | <b>Page No.</b> |
|-----------------------------|-----------------|-----------------|
| 22 Funding sources and role | Not described   | —               |

### Sample size

No formal sample size calculation was performed, as this study was a secondary analysis of a prospective registry.

### Missing data

Missing data were minimal and handled using complete-case analysis.

### Funding

This study received no external funding.
